# Supplementary figures and images for: NMR spectroscopy and multivariate statistical analysis of metabonomic changes in Allium macrostemon Bunge extracts induced by different drying methods
Source: Royal Society of Chemistry journal article supplement (doi:10.1039/c3ay40626a), 2013-01-01

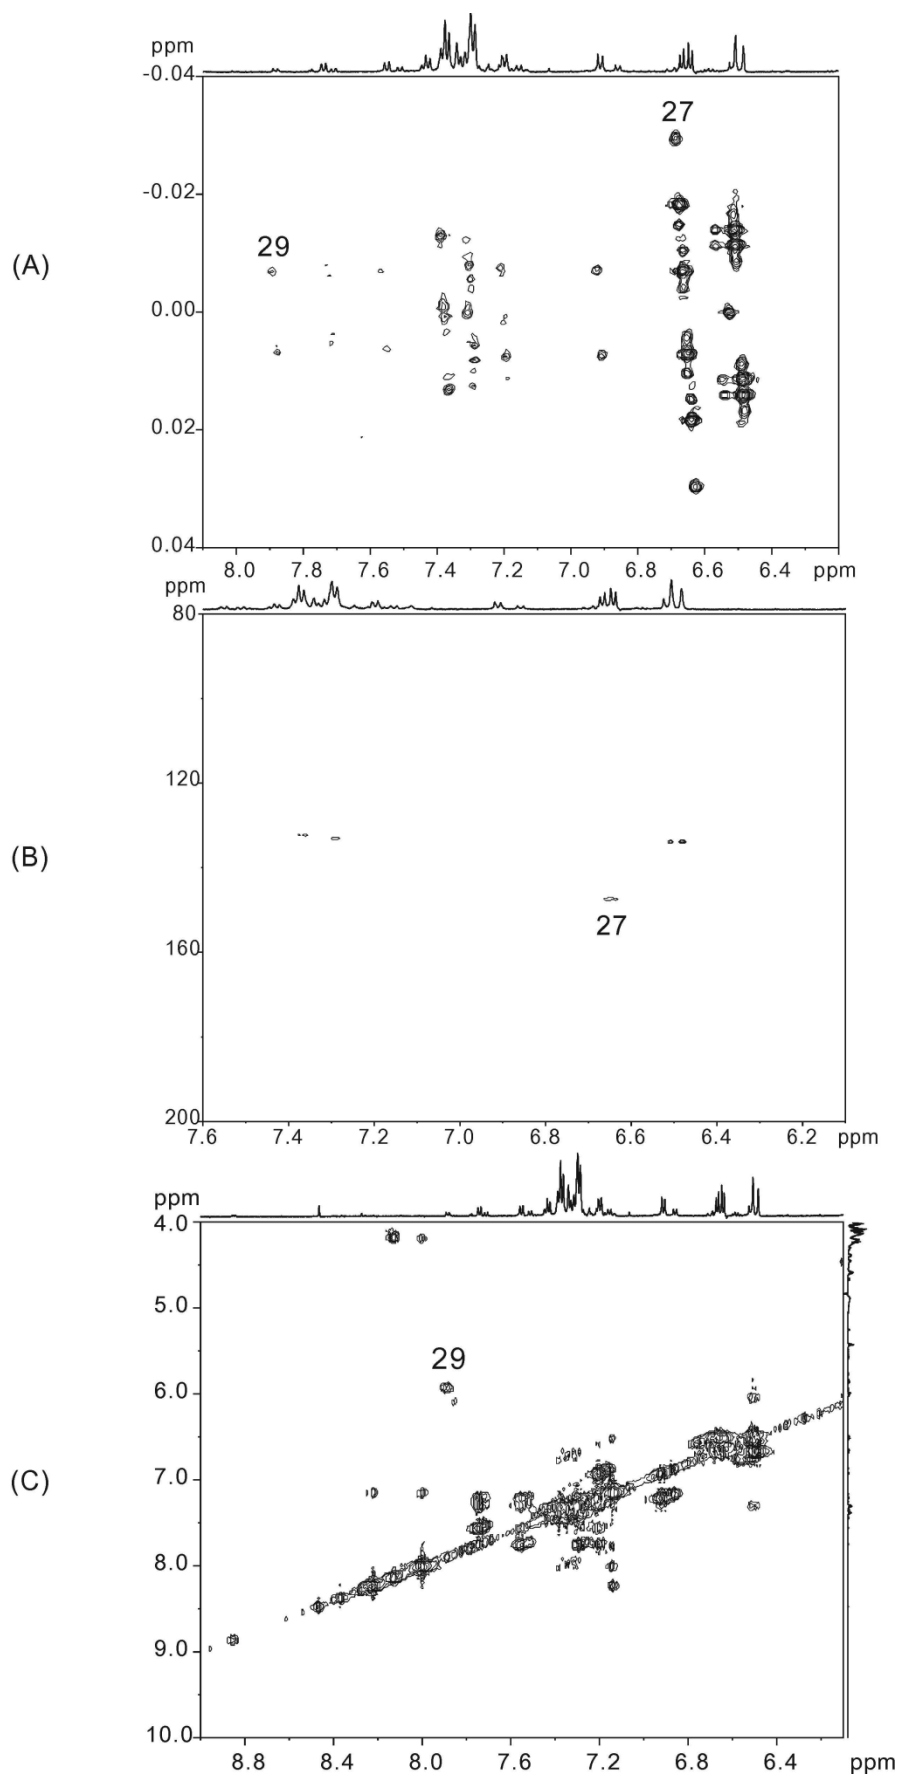

Fig. S1 2D NMR spectra for uridine and *N-trans*-feruloyltyramine

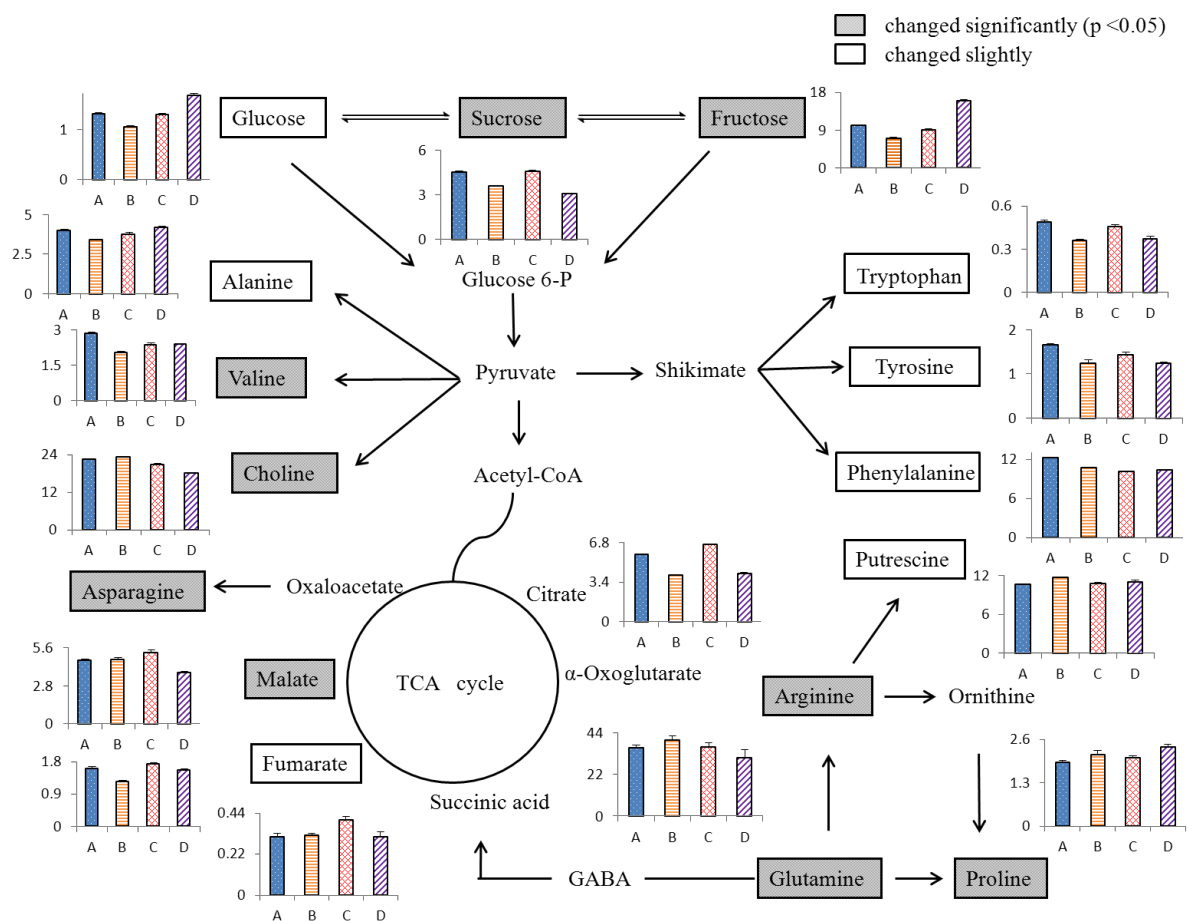

Fig. S2 Metabolic pathways

Supplement: c3ay40626a.pdf [file c3ay40626a.pdf]
